# Supplementary material for: Synthesis of renewable aviation fuel additives with aromatic aldehydes and methyl isobutyl ketone under solvent-free conditions
Source: Royal Society of Chemistry journal article supplement (doi:10.1039/d0se01544j), 2020-12-08
Supplement: d0se01544j1.pdf [file d0se01544j1.pdf]

## Supporting Information

### **Synthesis of renewable aviation fuel additives with aromatic aldehydes and methyl isobutyl ketone under solvent-free conditions**

Fengan Han,<sup>ab‡</sup> Jingyuan Xu,<sup>ac‡</sup> Guangyi Li,<sup>a</sup> Jilei Xu,<sup>a</sup> Aiqin Wang,<sup>ad</sup> Yu Cong,<sup>a</sup> Tao Zhang,<sup>a</sup> and

Ning Li <sup>\*a</sup>

<sup>a</sup> Department of Chemical Physics, School of Chemistry and Materials Science, University of Science and Technology of China, Hefei 230026, China.

<sup>b</sup> CAS Key Laboratory of Science and Technology on Applied Catalysis, Dalian Institute of Chemical Physics, Chinese Academy of Sciences, Dalian 116023, China.

<sup>c</sup> University of Chinese Academy of Sciences, 19 A Yuquan Road, Shijingshan District, Beijing 100049, China.

<sup>d</sup> Dalian National Laboratory for Clean Energy, Dalian 116023, China

<sup>‡</sup> These authors contributed equally to this work.

The number of pages: 33

The number of figures: 29

The number of table: 2

\*Corresponding authors: lining@dicp.ac.cn (Ning Li)

**Table S1** The reaction conditions used by the HDO processes reported in literature and this work.

| Entry                  | Substrate                                                                         | Main product                                                                      | Catalyst      | $P_{H_2}$ (MPa) | $T$ (K) | Solvent      |
|------------------------|-----------------------------------------------------------------------------------|-----------------------------------------------------------------------------------|---------------|-----------------|---------|--------------|
| 1 <sup>1</sup>         | 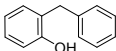 |  | Pd/C + HZSM-5 | 6               | 453     | Water        |
| 2 <sup>2</sup>         |  |  | Pd/C          | 6               | 453     | Water        |
| 3 <sup>3</sup>         |  |  | Pt/C          | 6               | 453     | Water        |
| 4 <sup>4</sup>         |  |  | Pt/C          | 5               | 403     | Cyclohexane  |
| 5 <sup>this work</sup> |  |  | Ru/C          | 4               | 398     | Solvent-free |

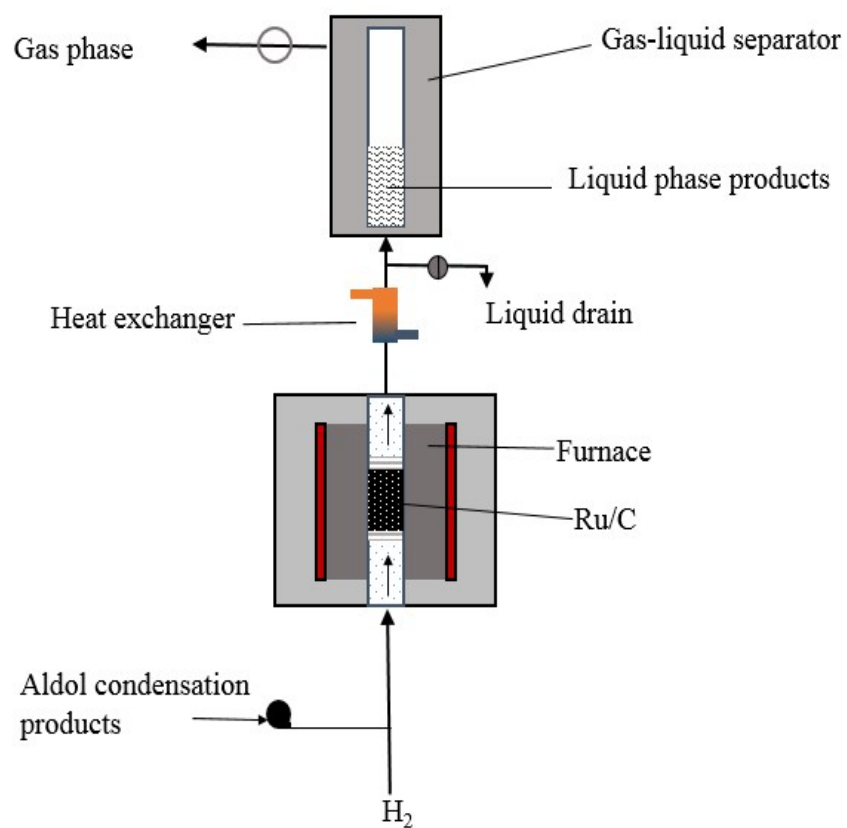

Fig. S1. Schematic diagram of hydrodeoxygenation reactor.

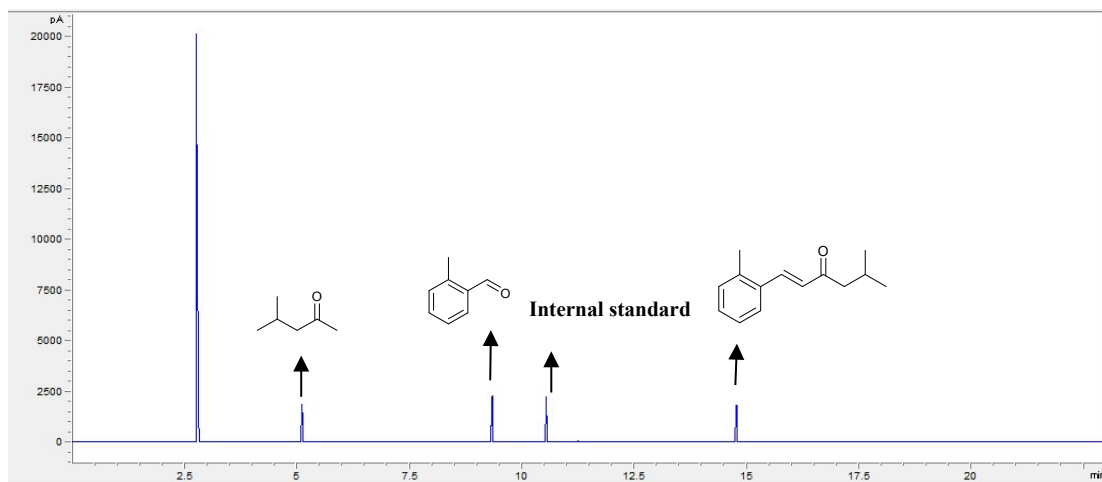

**Fig. S2.** Gas chromatogram of the aldol condensation product of 2-methyl benzaldehyde and MIBK. Reaction conditions: 4 mmol MIBK, 4 mmol 2-methyl benzaldehyde, 0.1 g Amberlyst-15 resin, 343 K for 6 h.

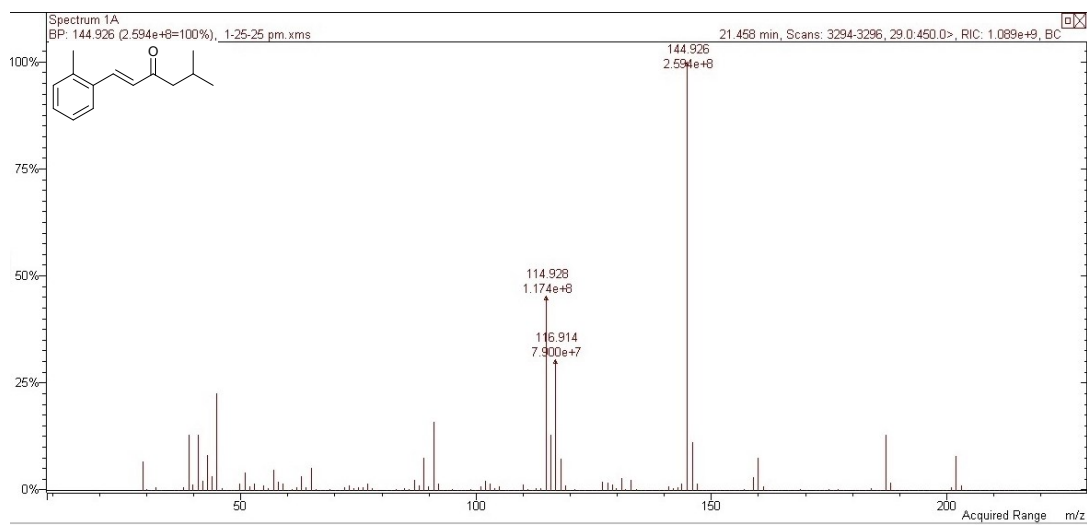

**Fig. S3.** Mass spectrogram of the **1A** from the aldol condensation of 2-methyl benzaldehyde and MIBK.

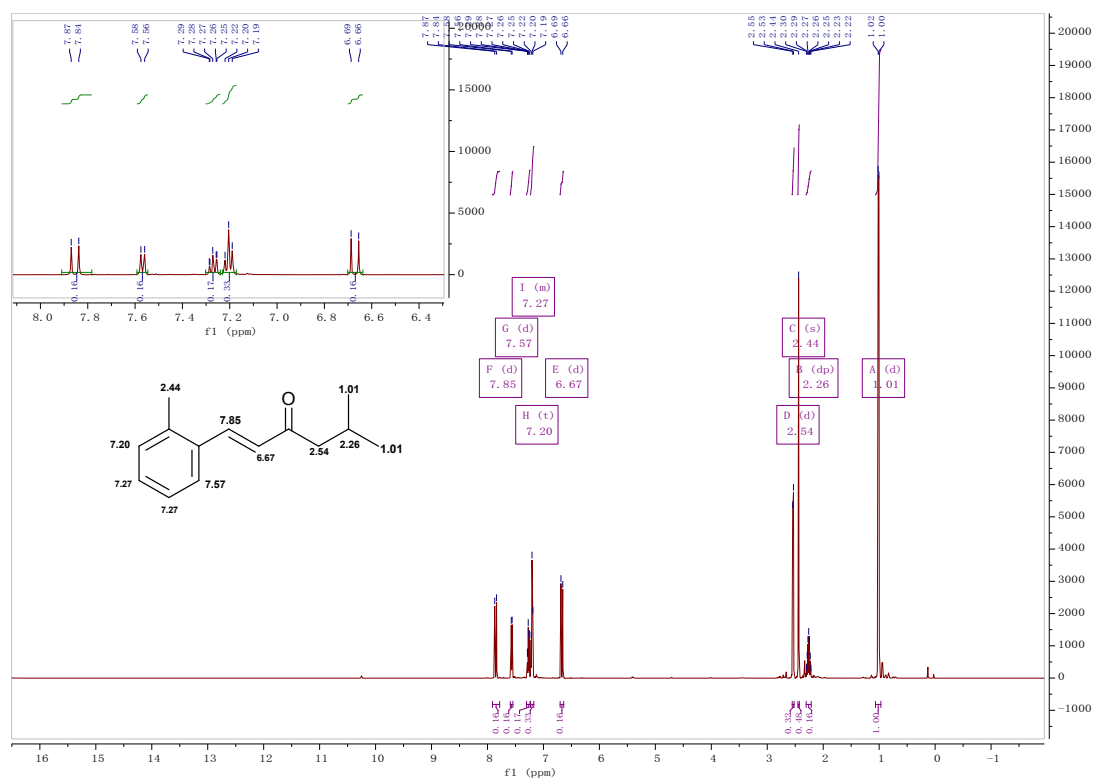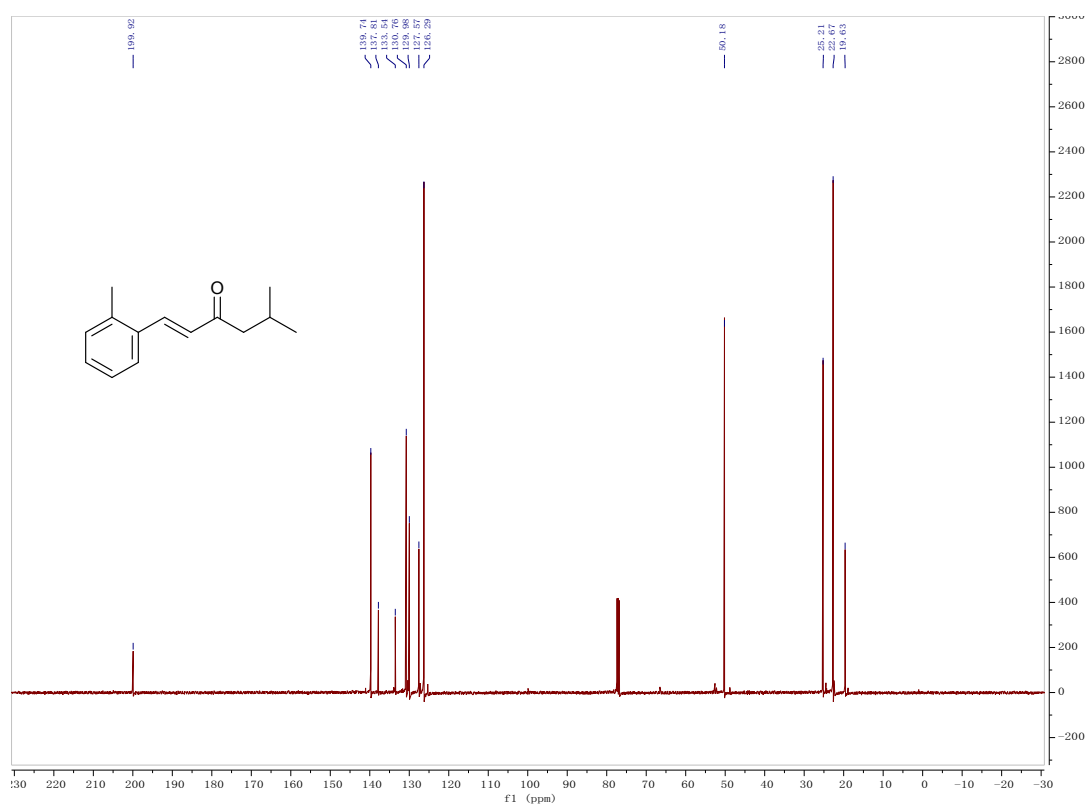

**Fig. S4.** <sup>1</sup>H-NMR and <sup>13</sup>C-NMR spectra of the 1A from the aldol condensation of 2-methyl benzaldehyde and MIBK.

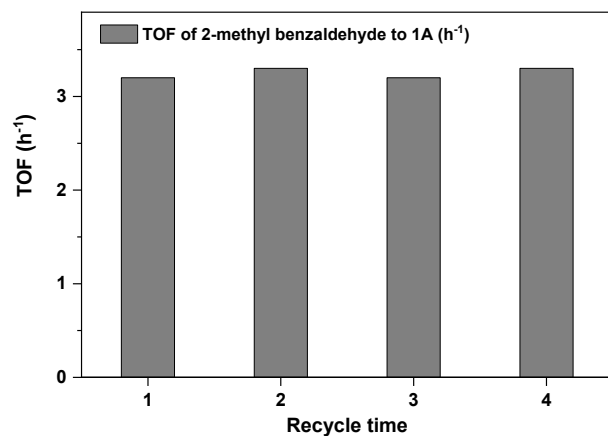

**Fig. S5.** Turnover frequency (TOF) of 2-methyl benzaldehyde to **1A** over Amberlyst-15 resin. Reaction conditions: 8 mmol MIBK, 4 mmol 2-methylbenzaldehyde, 0.1 g Amberlyst-15, 373 K for 2 h.

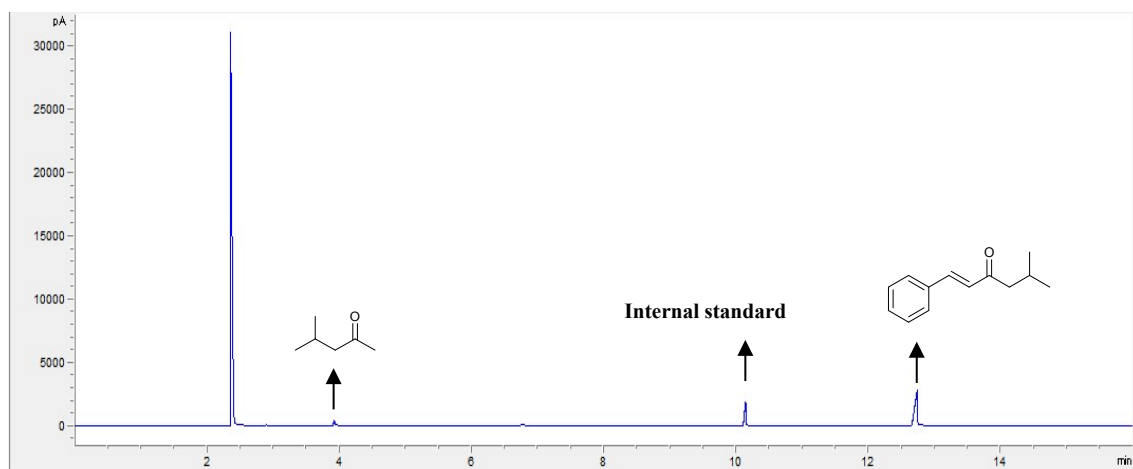

**Fig. S6.** Gas chromatogram of the aldol condensation product of benzaldehyde and MIBK. Reaction conditions: 8 mmol MIBK, 4 mmol benzaldehyde, 0.1 g Amberlyst-15 resin, 373 K for 10 h.



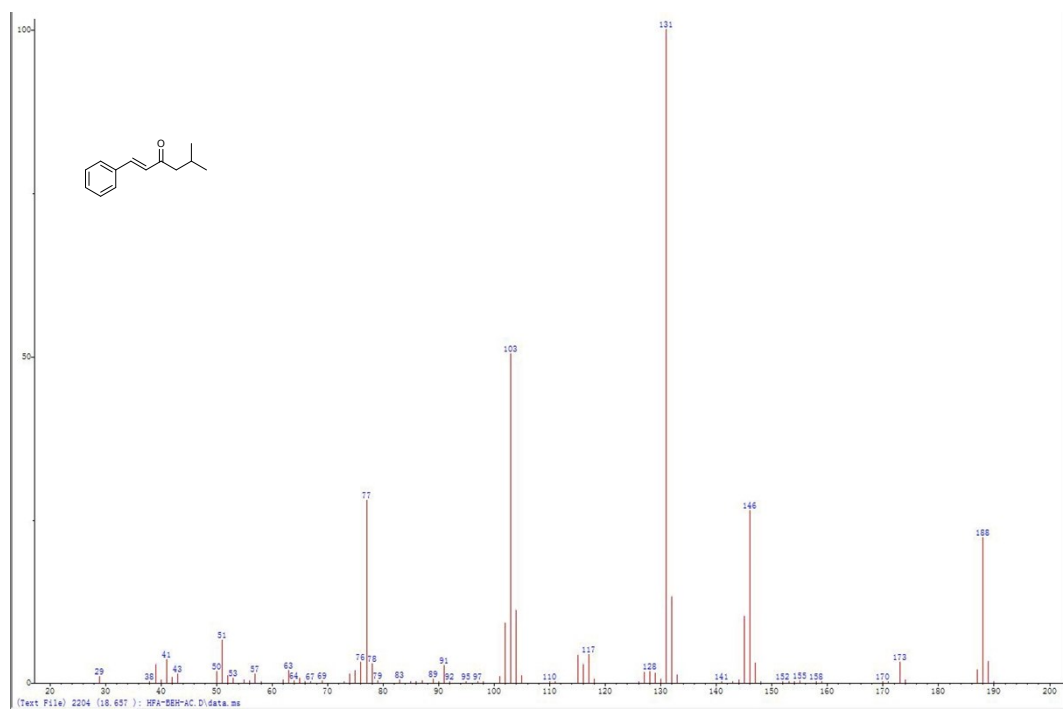

**Fig. S7.** Mass spectrogram of the **2A** from the aldol condensation of benzaldehyde and MIBK.



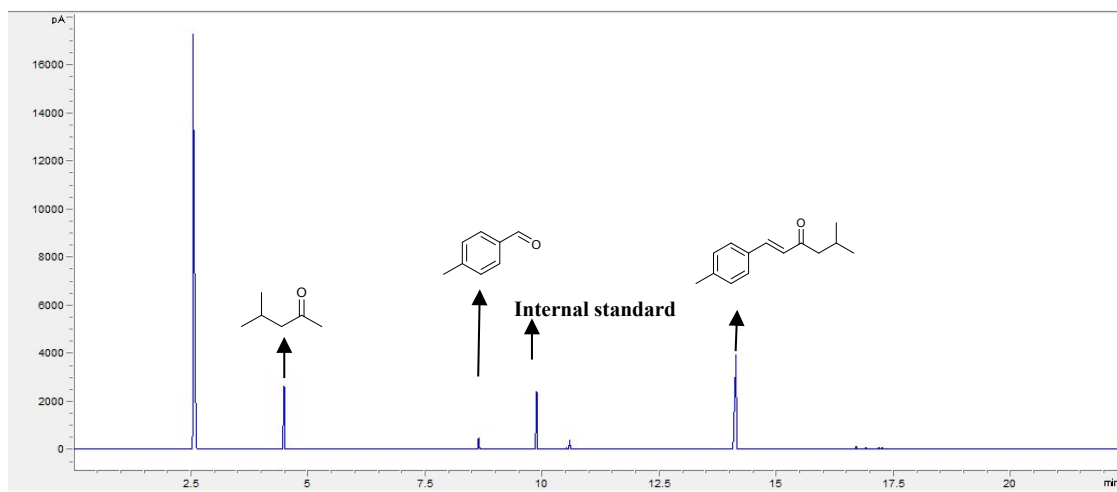

**Fig. S9** Gas chromatogram of the products from the aldol condensation of 4-methyl benzaldehyde and MIBK. Reaction conditions: 8 mmol MIBK, 4 mmol 4-methyl benzaldehyde, 0.1 g Amberlyst-15 resin, 373 K for 10 h.

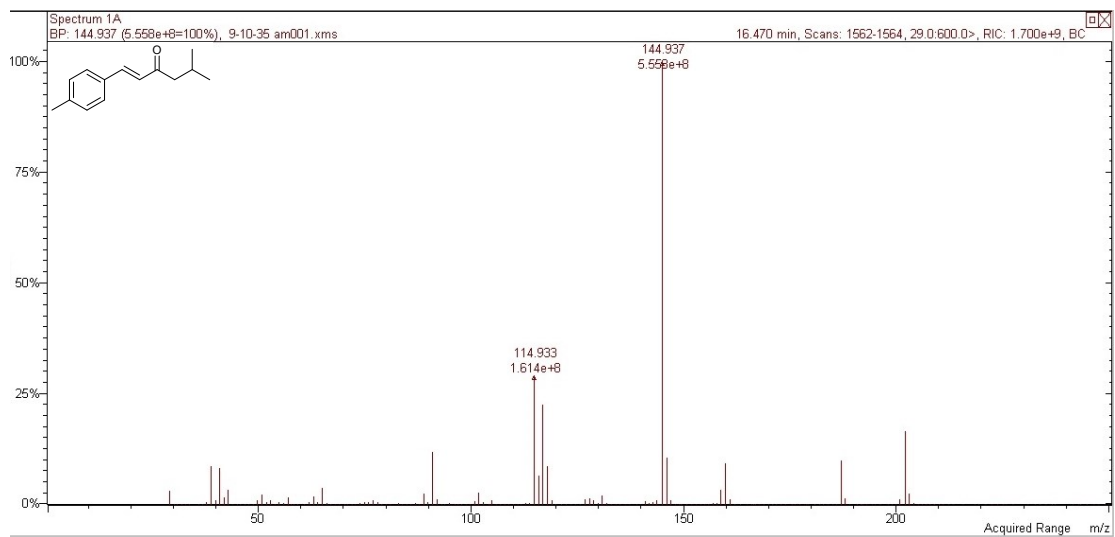

**Fig. S10.** Mass spectrogram of the **3A** from the aldol condensation of 4-methyl benzaldehyde and MIBK.

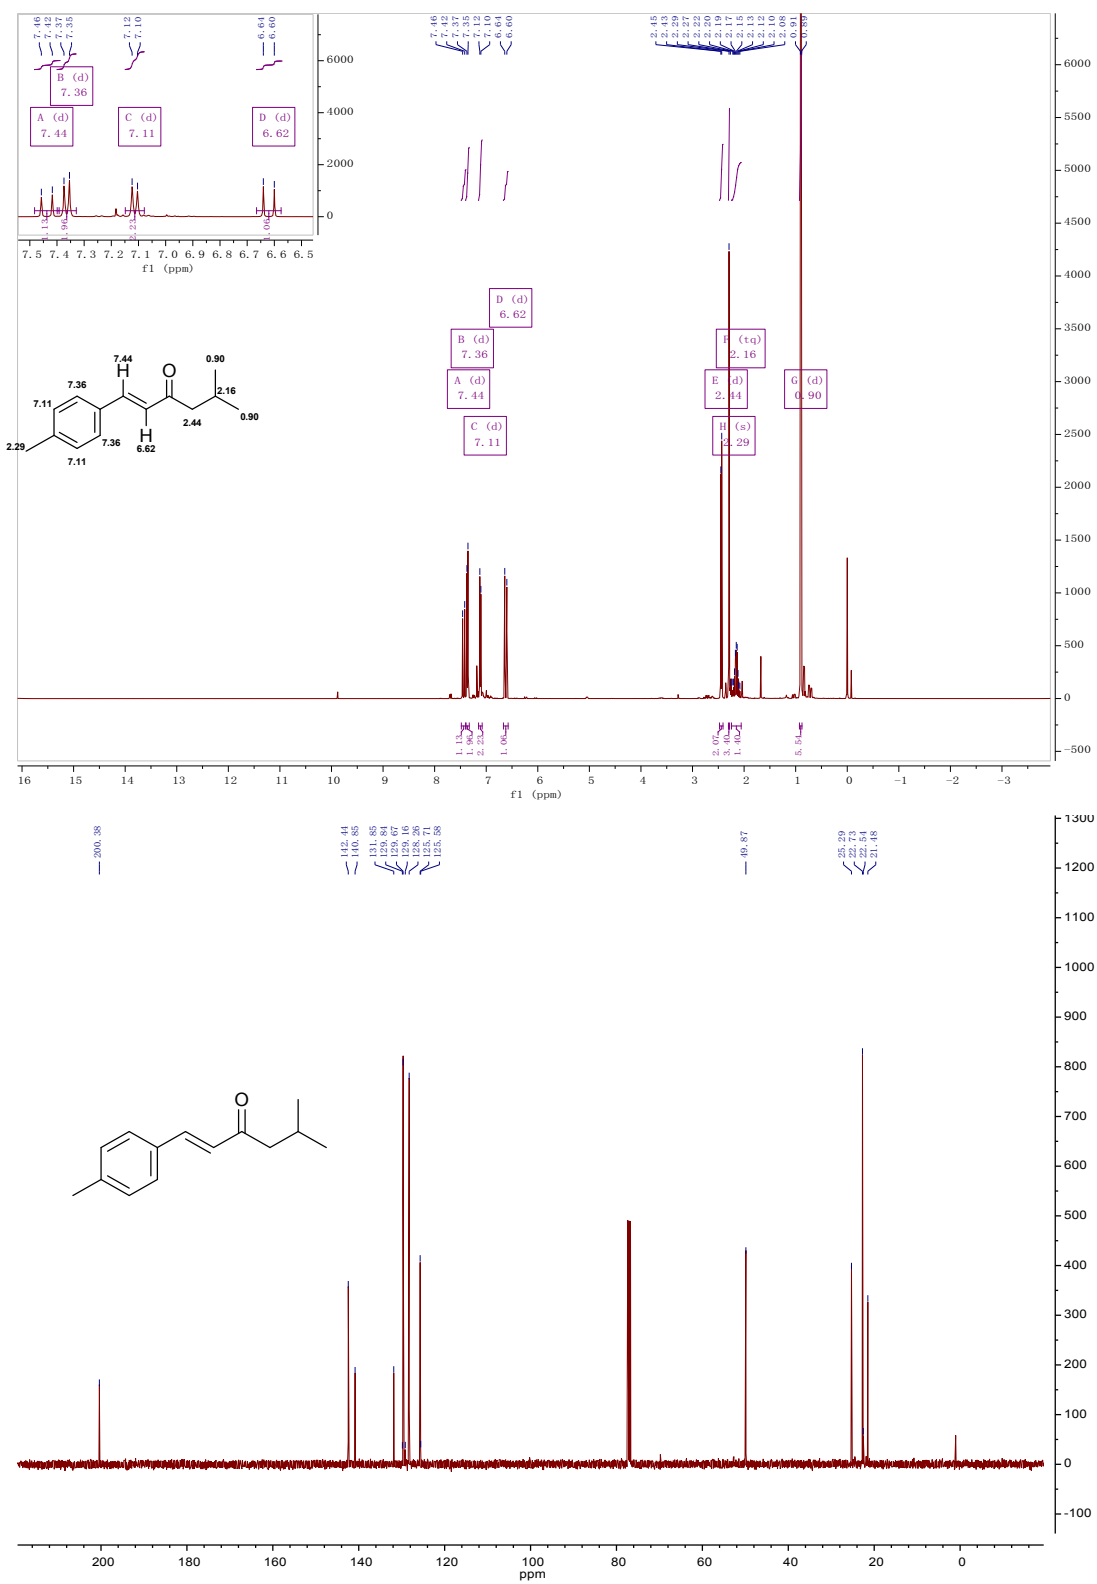

Fig. S11.  $^1\text{H-NMR}$  and  $^{13}\text{C-NMR}$  spectra of 3A from the aldol condensation of 4-methyl benzaldehyde and MIBK.

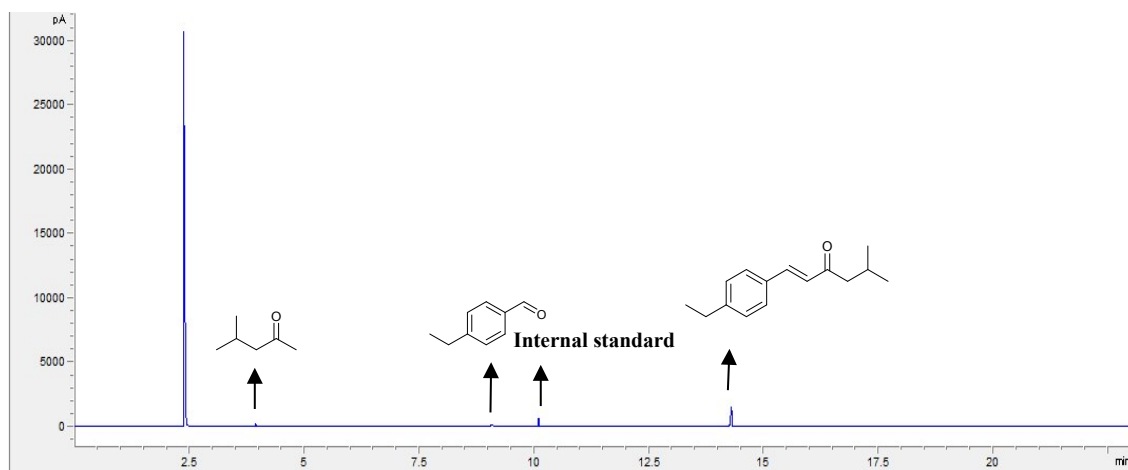

**Fig. S12.** Gas chromatogram of the aldol condensation product of 4-ethyl benzaldehyde and MIBK. Reaction conditions: 8 mmol MIBK, 4 mmol 4-ethyl benzaldehyde, 0.1 g Amberlyst-15 resin, 373 K for 10 h.

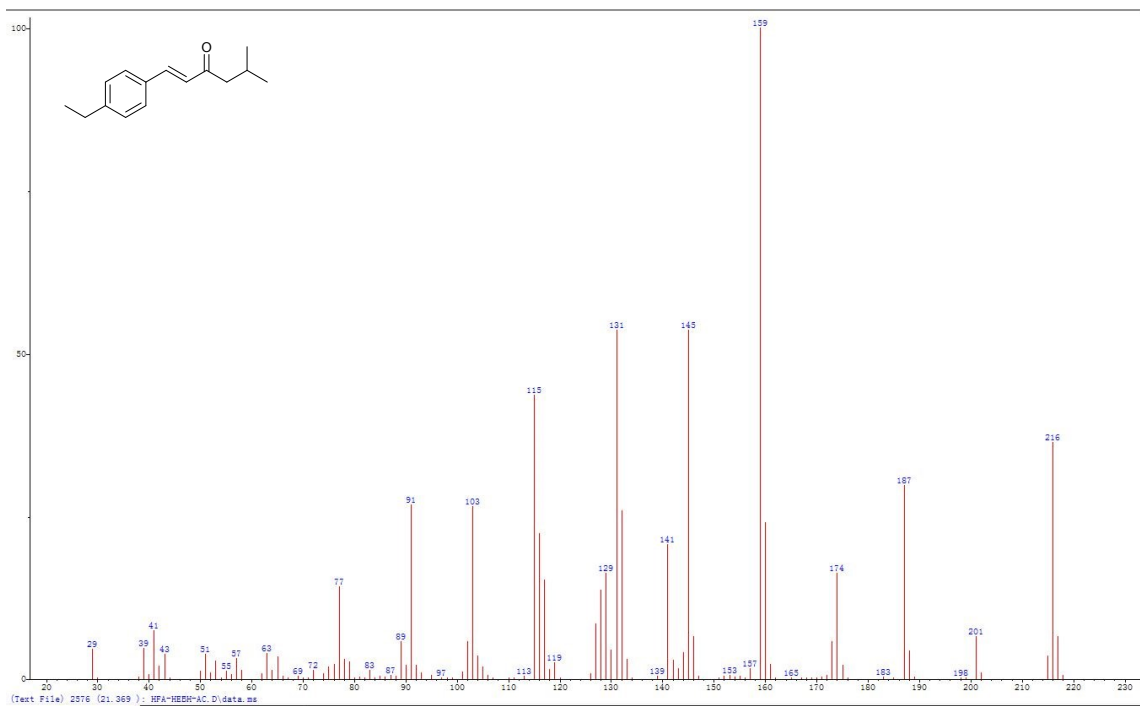

**Fig. S13.** Mass spectrometry of the **4A** from the aldol condensation of 4-ethyl benzaldehyde and MIBK.

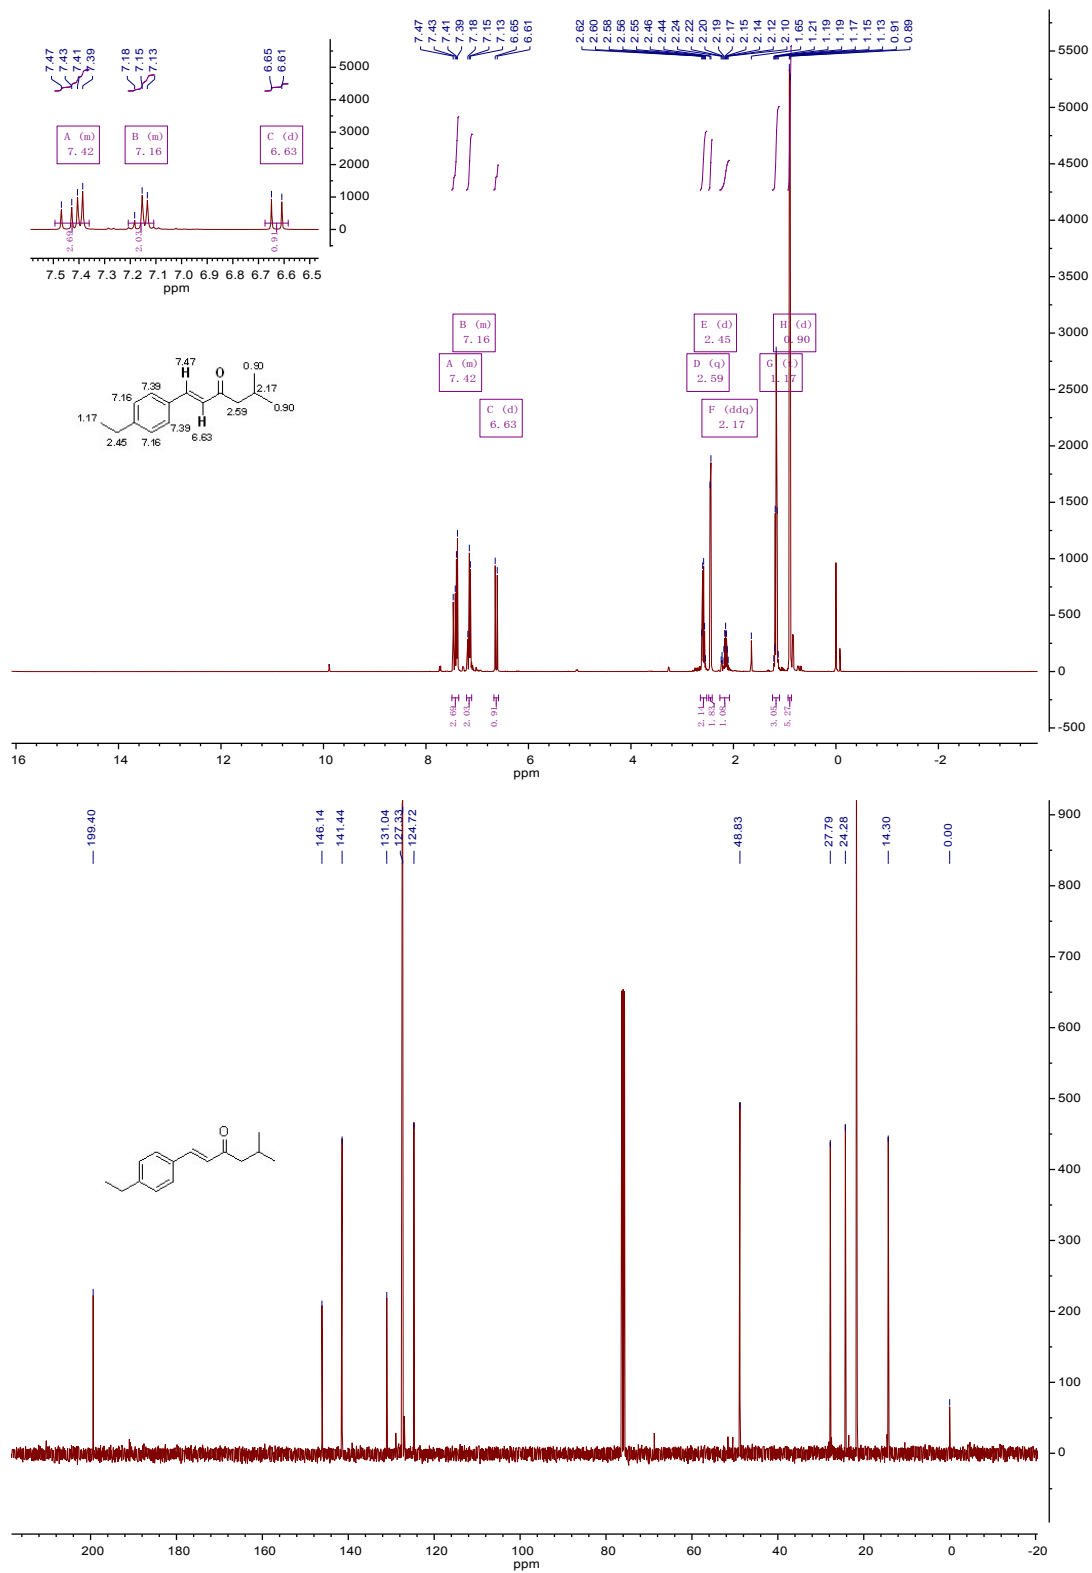

Fig. S14 <sup>1</sup>H-NMR and <sup>13</sup>C-NMR spectra of 4A from the aldol condensation of 4-ethyl benzaldehyde and MIBK.



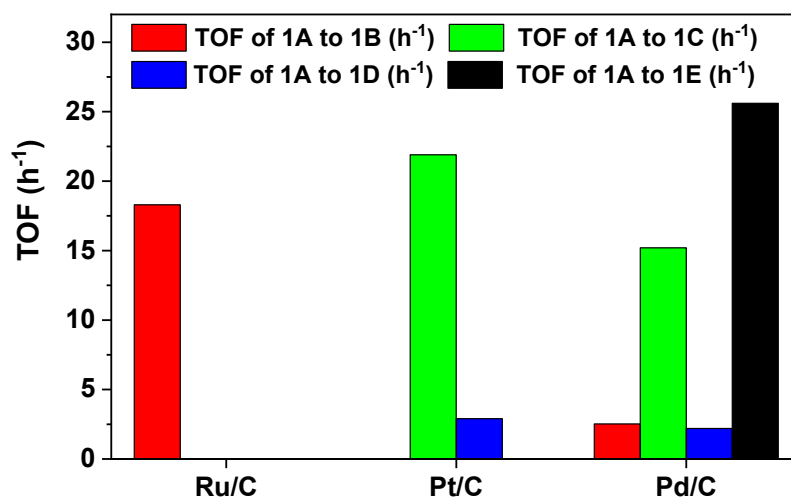

**Fig. S15.** TOFs of **1A** to different products from the solvent-free HDO of **1A** over the carbon supported noble metal catalysts. Reaction conditions: 423 K, 4 MPa H<sub>2</sub>, 0.5 g catalyst, liquid feedstock flow rate = 0.02 mL min<sup>-1</sup> (WHSV = 2.3 h<sup>-1</sup>), hydrogen flow rate = 120 mL min<sup>-1</sup>.

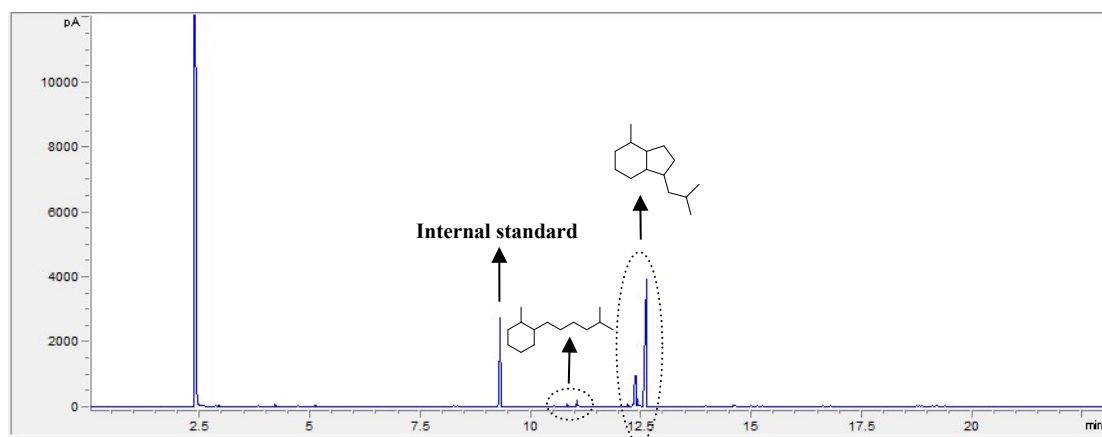

**Fig. S16.** Gas chromatogram of the HDO products of **1A** over the Ru/C catalyst. Reaction conditions: 398 K, 4 MPa H<sub>2</sub>, 0.5 g Ru/C catalyst, liquid feedstock flow rate = 0.02 mL min<sup>-1</sup> (WHSV = 2.3 h<sup>-1</sup>), hydrogen flow rate = 120 mL min<sup>-1</sup>.

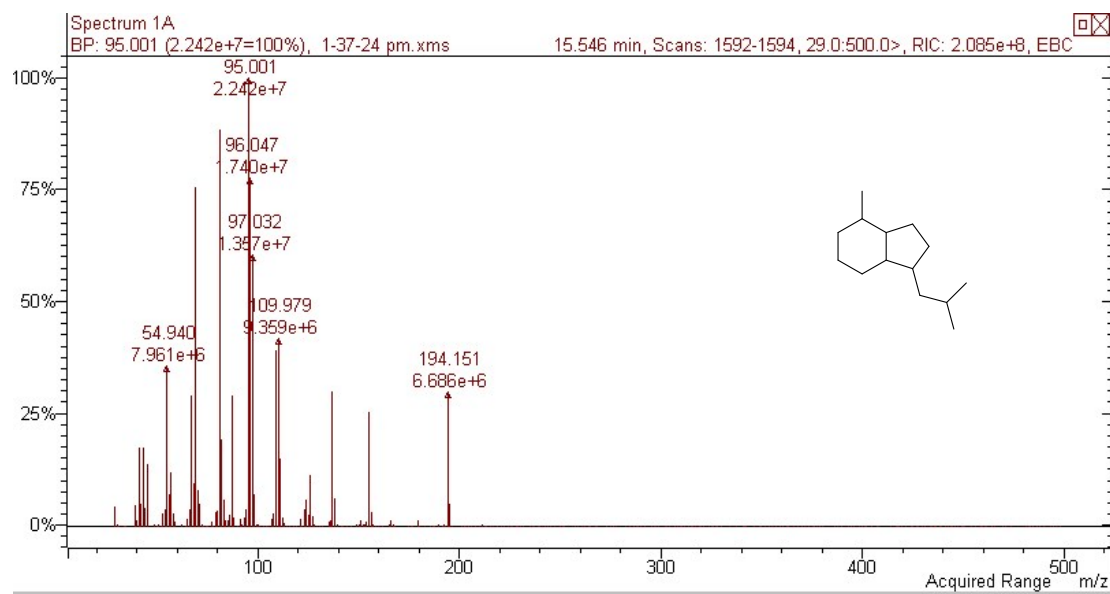

Fig. S17. Mass spectrogram of **1B** from the solvent-free HDO of **1A**.

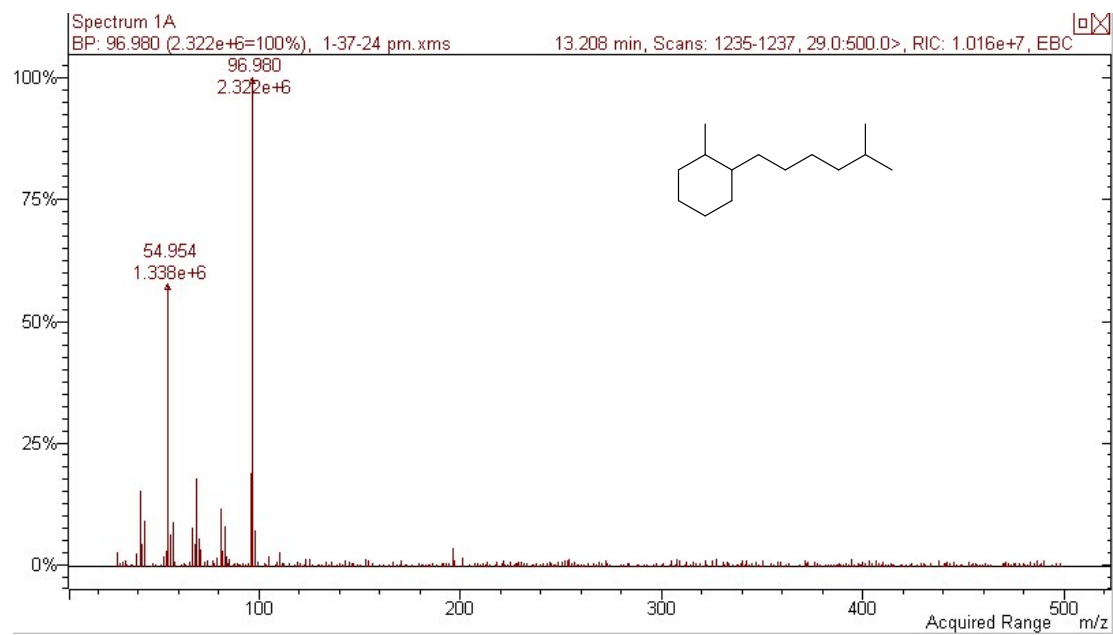

**Fig. S18.** Mass spectrogram of **1F** from the solvent-free HDO of **1A**.

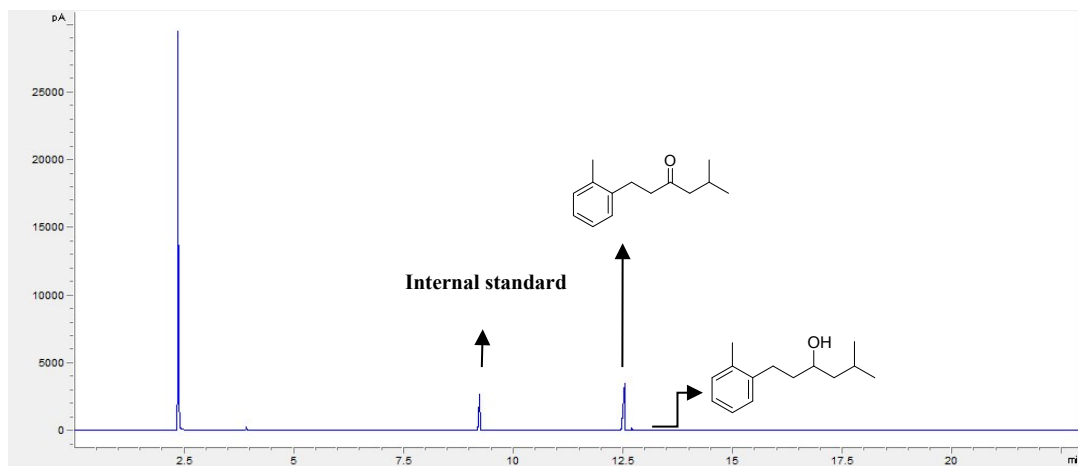

**Fig. S19.** Gas chromatogram of the hydrogenation products of **1A** over the Pt/C catalyst. Reaction conditions: 423 K, 4 MPa H<sub>2</sub>, 0.5 g Pt/C catalyst, liquid feedstock flow rate = 0.02 mL min<sup>-1</sup> (WHSV = 2.3 h<sup>-1</sup>), hydrogen flow rate = 120 mL min<sup>-1</sup>.

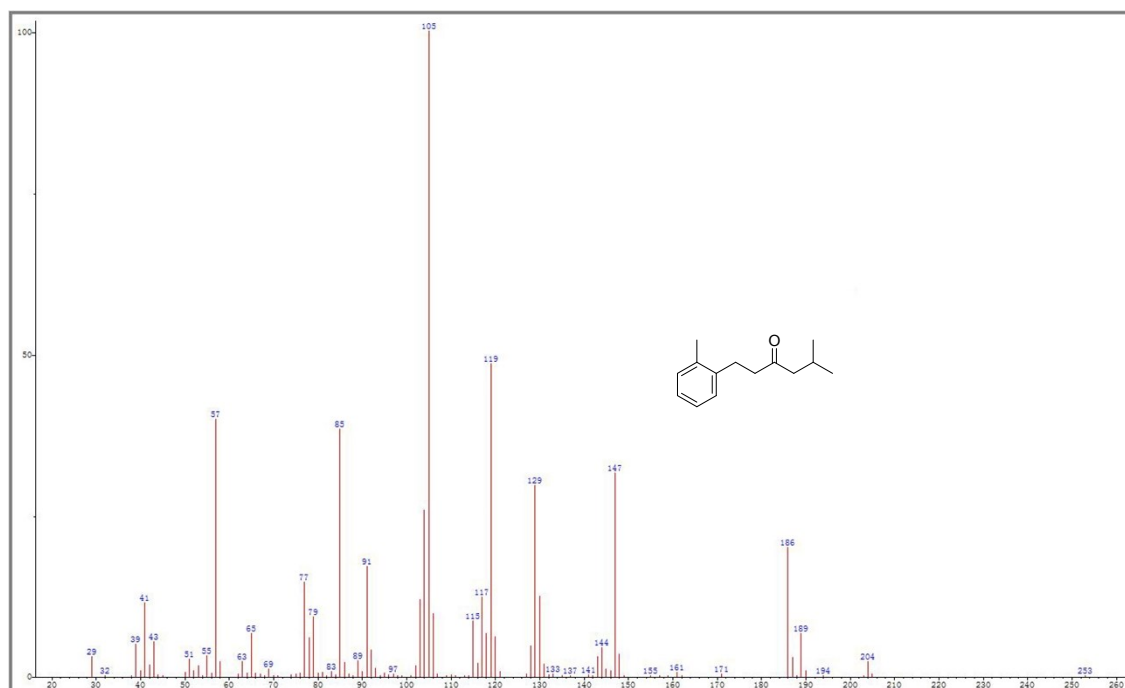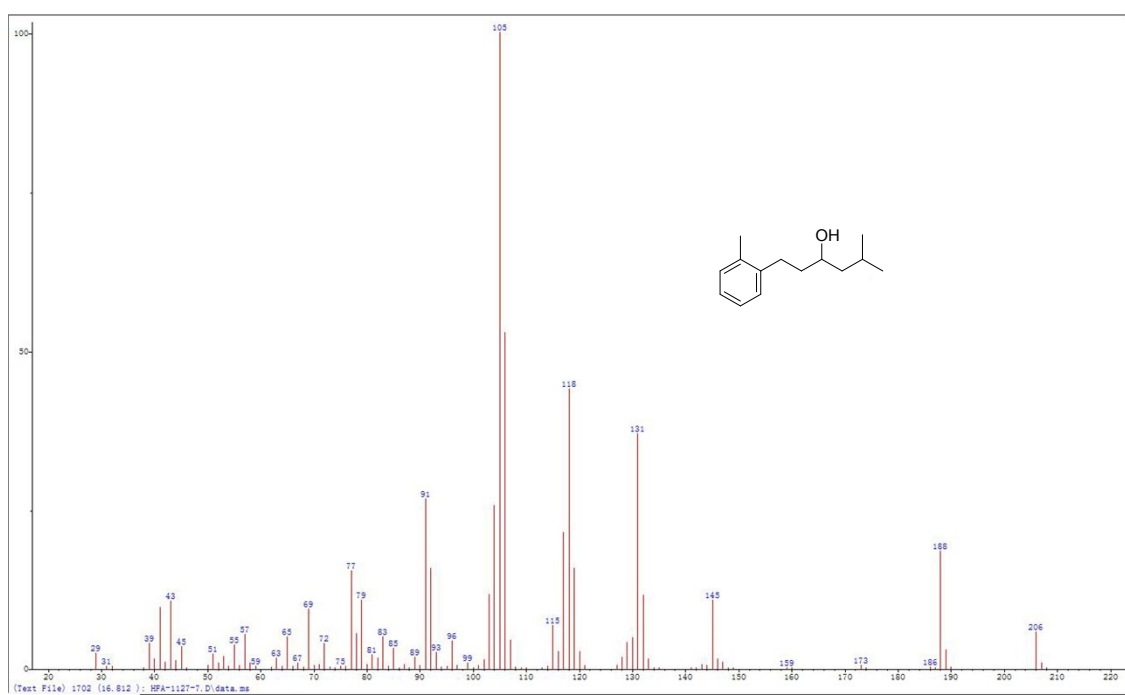

**Fig. S20.** Mass spectrogram of the 1C and 1D generated from the hydrogenation of 1A

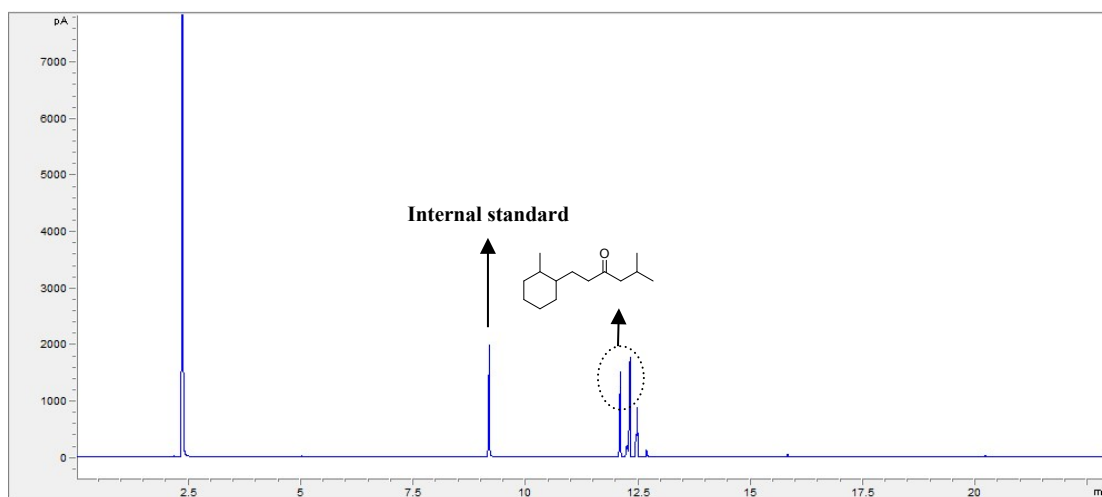

**Fig. S21.** Gas chromatogram of the hydrogenation products of **1A** over the Pd/C catalyst. Reaction conditions: 423 K, 4 MPa H<sub>2</sub>, 0.5 g Pd/C catalyst, liquid feedstock flow rate = 0.02 mL min<sup>-1</sup> (WHSV = 2.3 h<sup>-1</sup>), hydrogen flow rate = 120 mL min<sup>-1</sup>.

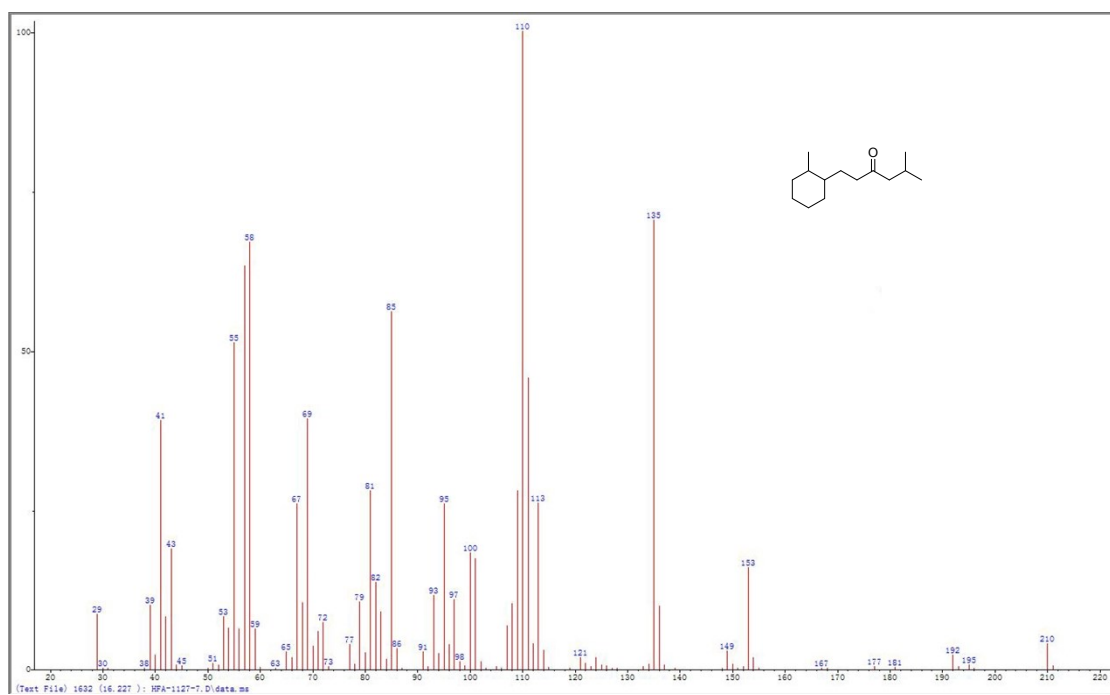

**Fig. S22.** Mass spectrogram of the **1E** generated from hydrogenation of **1A**.



**Table S2** Physical properties of typical aviation fuel additives.

|                                   |                                                                                   |                                                                                   |                                                                                     |
|-----------------------------------|-----------------------------------------------------------------------------------|-----------------------------------------------------------------------------------|-------------------------------------------------------------------------------------|
| Molecular structure               |  |  |  |
| Chemical name                     | 1,2,3,4-Tetrahydronaphthalene                                                     | Decalin                                                                           | 1,2,3,4-Tetrahydroquinoline                                                         |
| Molecular formula                 | $C_{10}H_{12}$                                                                    | $C_{10}H_{18}$                                                                    | $C_9H_{11}N$                                                                        |
| Density at 293 K ( $g\ mL^{-1}$ ) | 0.96 <sup>5</sup>                                                                 | 0.86 <sup>6</sup>                                                                 | 1.03 <sup>7</sup>                                                                   |
| Freezing point (K)                | 237.2 <sup>8</sup>                                                                | 231.8 <sup>9</sup>                                                                | --                                                                                  |

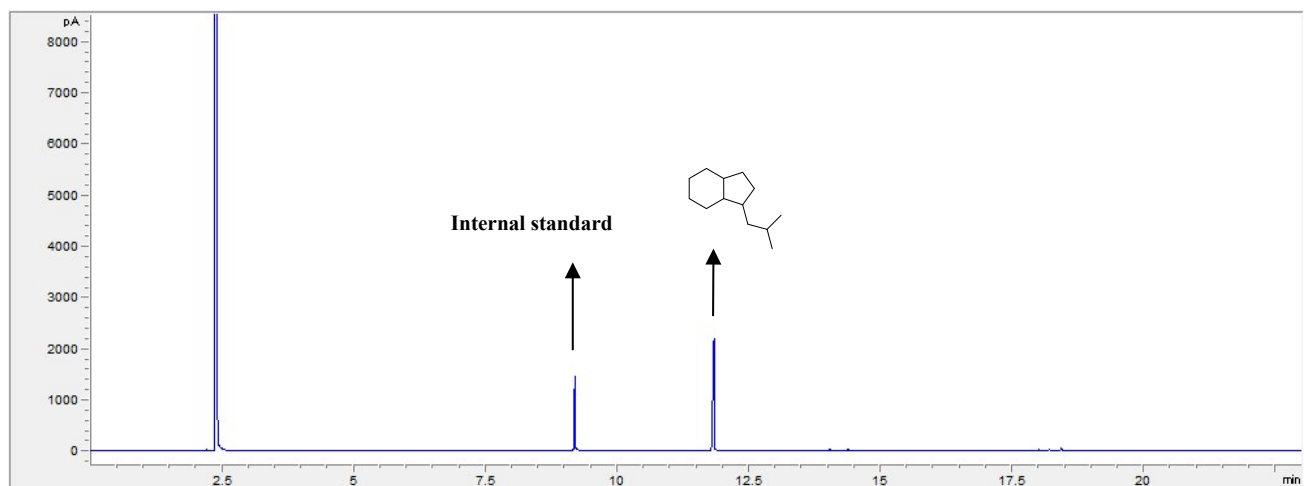

**Fig. S23.** Gas chromatogram of the HDO product of **2A** over the Ru/C catalyst. Reaction conditions: 398 K, 4 MPa H<sub>2</sub>, 0.5 g Ru/C catalyst, liquid feedstock flow rate = 0.02 mL min<sup>-1</sup>, hydrogen flow rate = 120 mL min<sup>-1</sup>.

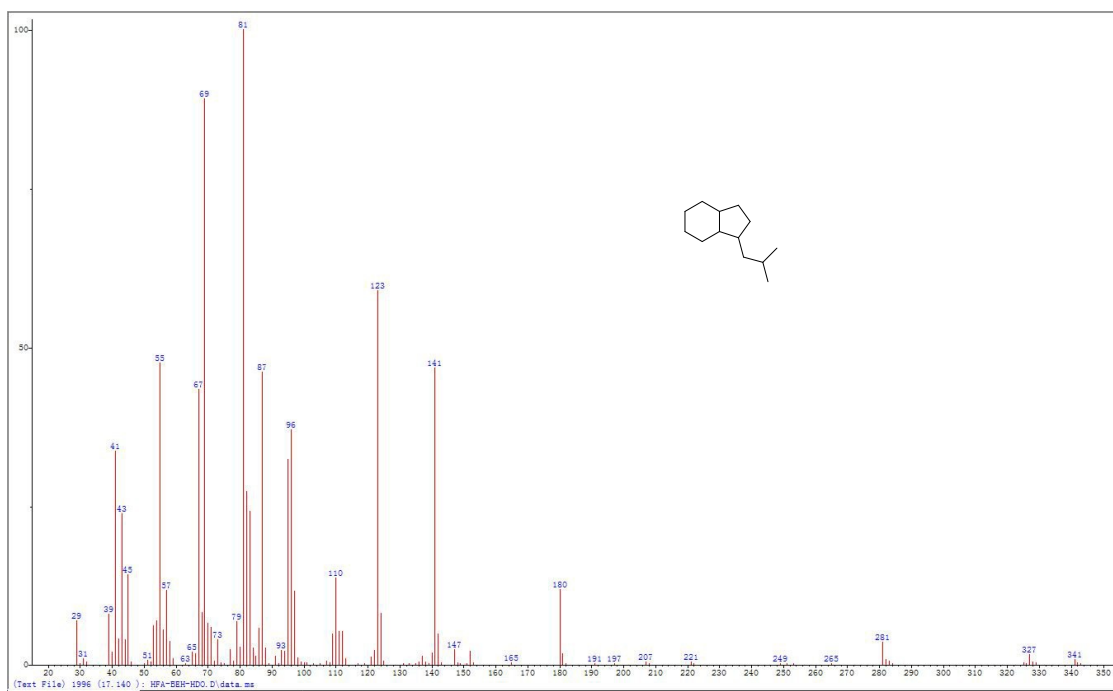

**Fig. S24.** Mass spectrum of **2B** from the solvent-free HDO of **2A**.

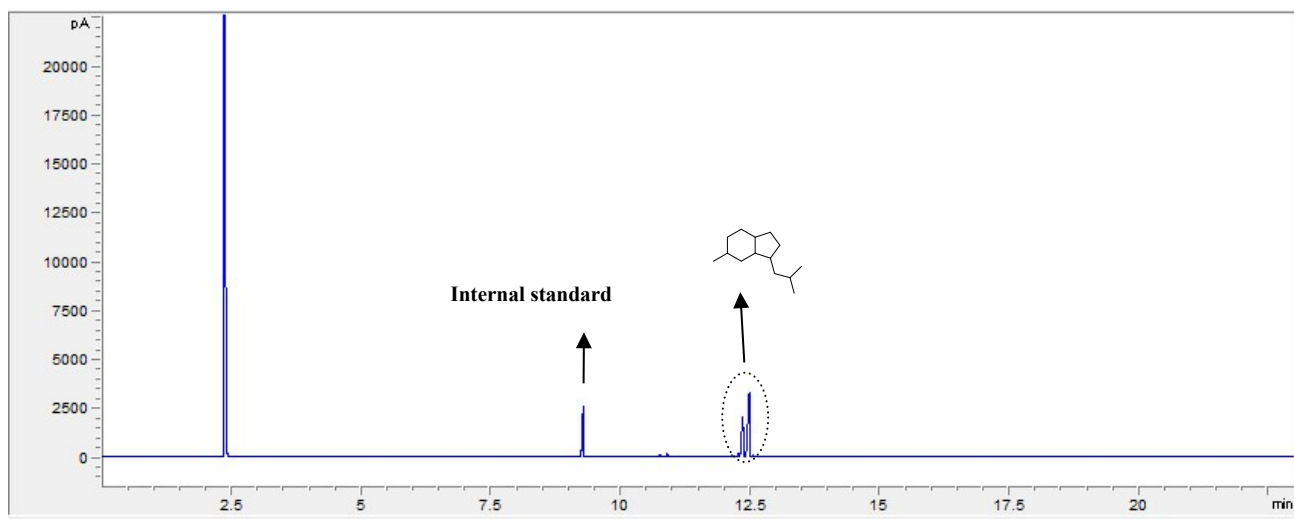

**Fig. S25.** Gas chromatogram of the HDO product of **3A** over the Ru/C catalyst. Reaction conditions: 398 K, 4 MPa H<sub>2</sub>, 0.5 g Ru/C catalyst, liquid feedstock flow rate = 0.02 mL min<sup>-1</sup> (WHSV = 2.3 h<sup>-1</sup>), hydrogen flow rate = 120 mL min<sup>-1</sup>.

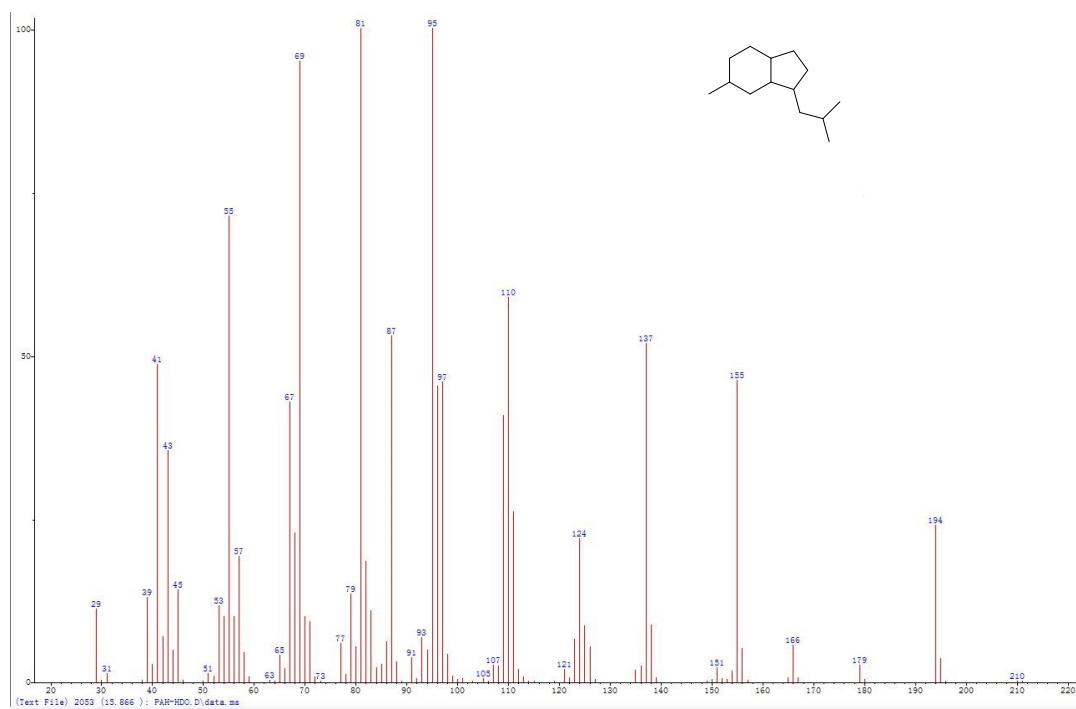

**Fig. S26.** Mass spectrum of **3B** from the solvent-free HDO of **3A**.

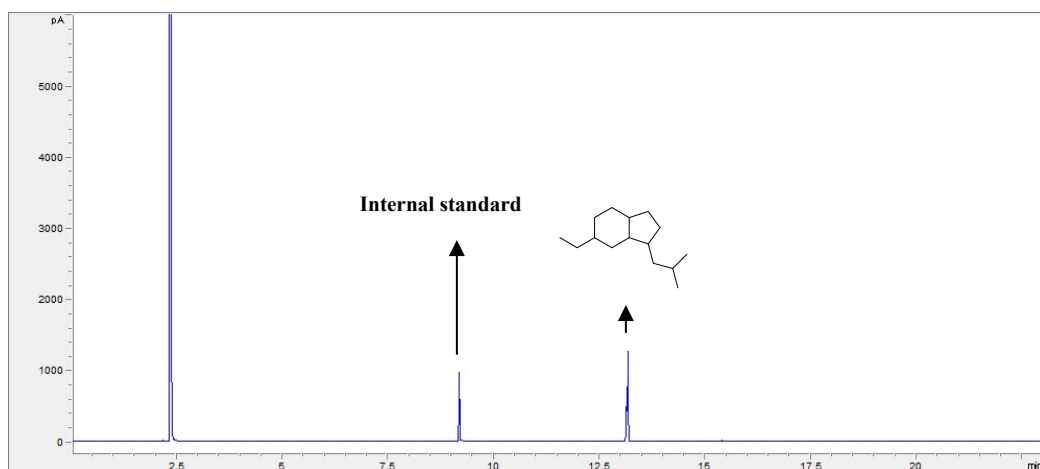

**Fig. S27.** Gas chromatogram of the HDO product of **4A** over the Ru/C catalyst. Reaction conditions: 398 K, 4 MPa H<sub>2</sub>, 0.5 g Ru/C catalyst, liquid feedstock flow rate = 0.02 mL min<sup>-1</sup>, hydrogen flow rate = 120 mL min<sup>-1</sup>.

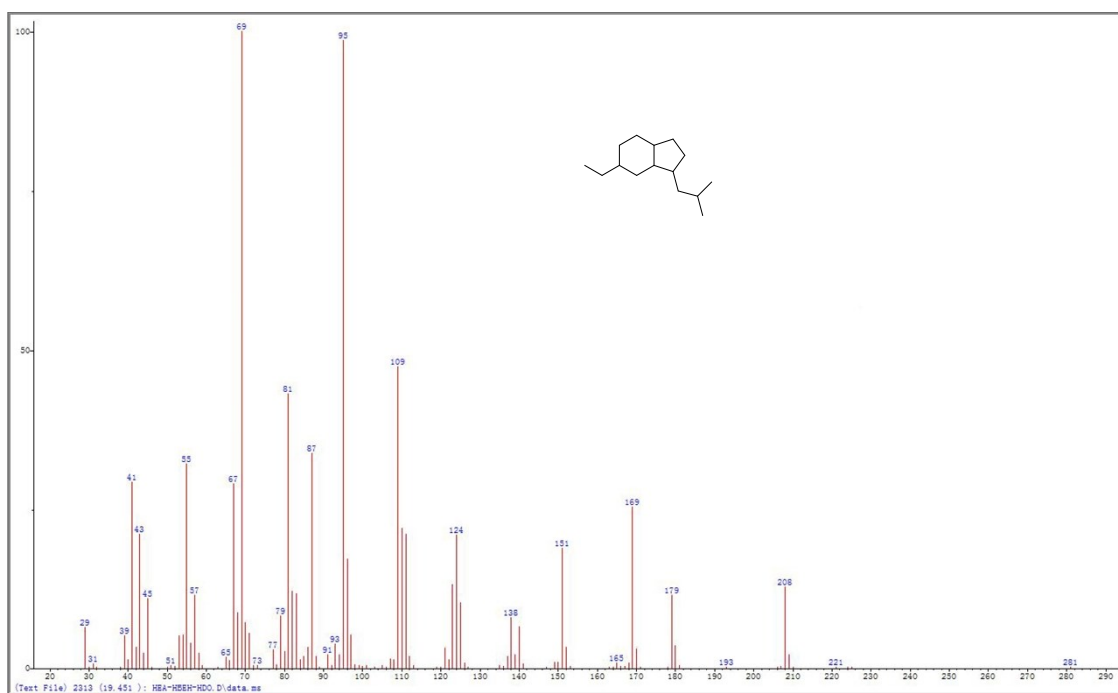

**Fig. S28.** Mass spectrogram of the **4B** from the solvent-free HDO of **4A**.

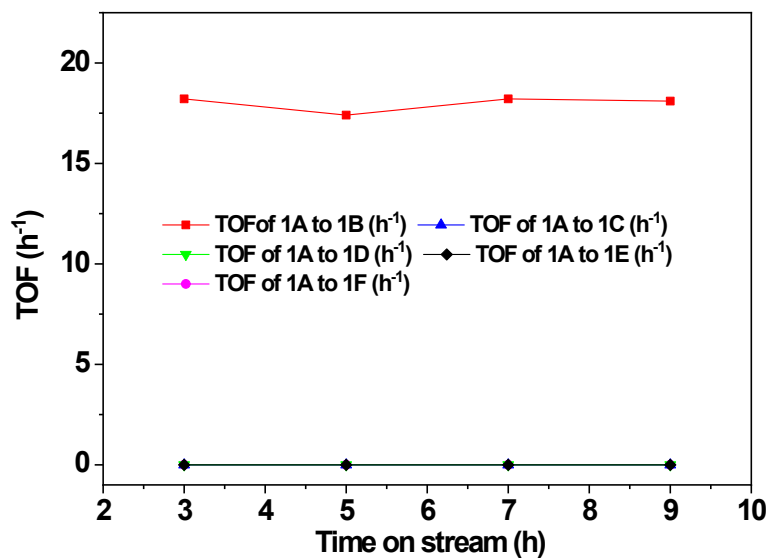

**Fig. S29.** TOF of **1A** to different products from the solvent-free HDO of **1A** over Ru/C catalyst as the function of time on stream. Reaction conditions: 398 K, 4 MPa H<sub>2</sub>, 0.5 g Ru/C catalyst, liquid feedstock flow rate = 0.02 mL min<sup>-1</sup> (WHSV = 2.3 h<sup>-1</sup>), hydrogen flow rate = 120 mL min<sup>-1</sup>.



## Notes and references

- 1 G. Nie, X. Zhang, L. Pan, P. Han, J. Xie, Z. Li, J. Xie, J.-J. Zou, *Chem. Eng. Sci.*, 2017, **173**, 91.
- 2 J. Xu, N. Li, G. Li, F. Han, A. Wang, Y. Cong, X. Wang, T. Zhang, *Green Chem.*, 2018, **20**, 3753.
- 3 X. Zhang, F. Han, S. Lin, F. Chen, M. Sun, J. Liu, G. Li, H. Tang, A. Wang, Y. Cong, N. Li, *ACS Sustainable Chem. Eng.*, 2019, **7**, 12023.
- 4 A. A. Timothy, F. Han, G. Li, J. Xu, A. Wang, Y. Cong, N. Li, *Sustainable Energy Fuels*, 2020, **4**, 5560.
- 5 X. Gong, Y. Guo, J. Xiao, Y. Yang, W. Fang, *Journal of Chemical & Engineering Data*, 2012, **57**, 3278.
- 6 H. Chi, G. Li, Y. Guo, L. Xu, W. Fang, *Journal of Chemical & Engineering Data*, 2013, **58**, 2224.
- 7 W. V. Steele, R. D. Chirico, I. A. Hossenlopp, A. Nguyen, N. K. Smith, B. E. Gammon, *J. Chem. Thermodyn.*, 1989, **21**, 1121.
- 8 W. Karo, R. L. McLaughlin, H. F. Hipsher, *J. Am. Chem. Soc.*, 1953, **75**, 3233.
- 9 R. Wang, G. Li, H. Tang, A. Wang, G. Xu, Y. Cong, X. Wang, T. Zhang, N. Li, *ACS Sustainable Chem. Eng.*, 2019, **7**, 17354.
